# Supplementary material for: Al2O3/yttrium compound core–shell structure formation with burst nucleation: a process driven by electrostatic attraction and high surface energy
Source: Royal Society of Chemistry journal article supplement (doi:10.1039/c4ra09856k), 2014-01-01
Supplement: c4ra09856k1.pdf [file c4ra09856k1.pdf]

## Supporting Information

### **Al<sub>2</sub>O<sub>3</sub>/Yttrium-compound core-shell structure formation with burst nucleation: a process driven by electrostatic attraction and high surface energy**

Daidong Guo,<sup>a,†</sup> Lili Zhao,<sup>a,†</sup> Yuanhua Sang,<sup>a,\*</sup> Hong Liu,<sup>a,\*</sup> Shaohong Liu,<sup>b</sup> Xudong Sun<sup>b</sup>

<sup>a</sup> State Key Laboratory of Crystal Materials, Shandong University, 27 Shandan Road, Jinan, 250100, China

<sup>b</sup> School of Materials and Metallurgy, Northeastern University, Shenyang, 110004, China

<sup>†</sup> These authors contribute equal to this work

\*Corresponding authors: [sangyh@sdu.edu.cn](mailto:sangyh@sdu.edu.cn) (Y. Sang); [hongliu@sdu.edu.cn](mailto:hongliu@sdu.edu.cn) (H. Liu)

Table S1. The residual ions in the solution after filtration measured by the inductively coupled plasma emission spectrometer (ICP-AES, IRIS Intrepid II XSP, Thermo Electron Corporation, USA). It is confirmed that there is little Y ions washed away.

The stoichiometry of YAG can be realized with high precise.

| Element | 1 <sup>st</sup> filtration (ppm) | 2 <sup>nd</sup> filtration (ppm) | 3 <sup>rd</sup> filtration (ppm) |
|---------|----------------------------------|----------------------------------|----------------------------------|
| Al      | 0.03(1)                          | 0.03(1)                          | 0.01(1)                          |
| Y       | 0.45(2)                          | 0.13(1)                          | 0.24(1)                          |

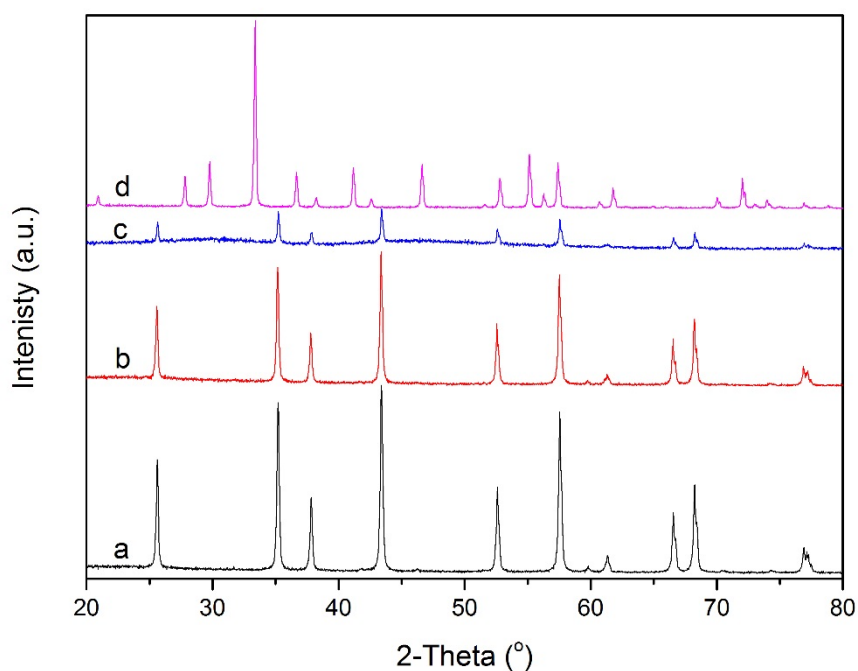

Figure S1. XRD patterns of  $\alpha$ - $\text{Al}_2\text{O}_3$  (a); the mid-product precursor obtained from the suspension at pH=2.6 (b); the YAG precursor obtained from the suspension at pH=6.8 (c); and YAG particles calcined at 1250°C for 2h (d).

The XRD patterns (a-c) are similar and all corresponding to rhombohedral  $\text{Al}_2\text{O}_3$  ( $\alpha$ - $\text{Al}_2\text{O}_3$ , PDF#10-0173). The difference is that the diffraction intensity become weak with reaction process and there is an amorphous diffraction is noticed in pattern (c) around 30 °. It implies the increase of the shell thickness during the homogeneous precipitation process. XRD pattern (d) is identified as pure  $\text{Y}_3\text{Al}_5\text{O}_{12}$  phase (PDF#72-1315), indicating a complete phase transition.

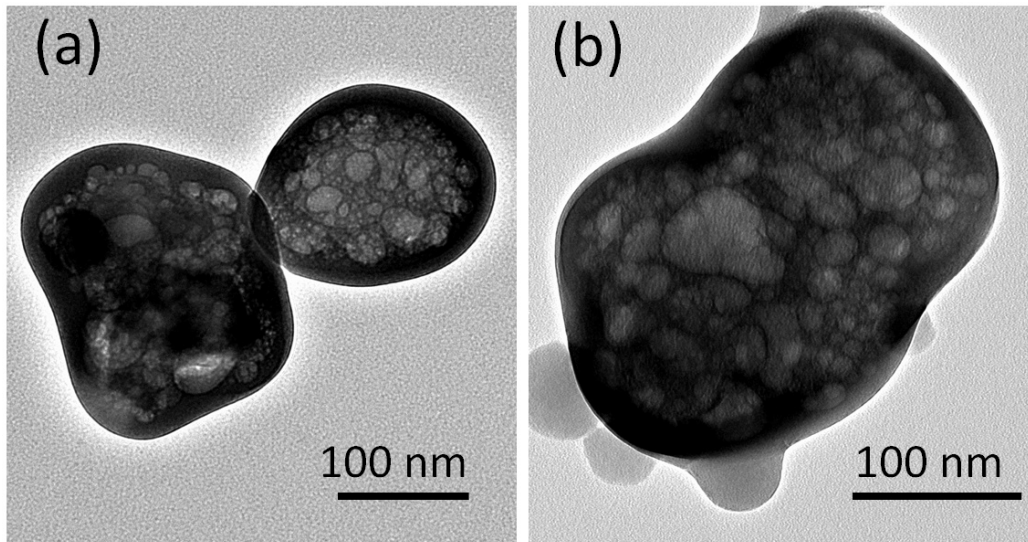

Figure S2. The final YAG precursor under high electron explore. The surface of the material is easily decomposed. Based on the stability of  $\alpha\text{-Al}_2\text{O}_3$  and the unstability of Y-compounds, the shell structure is deemed as Y-compound.

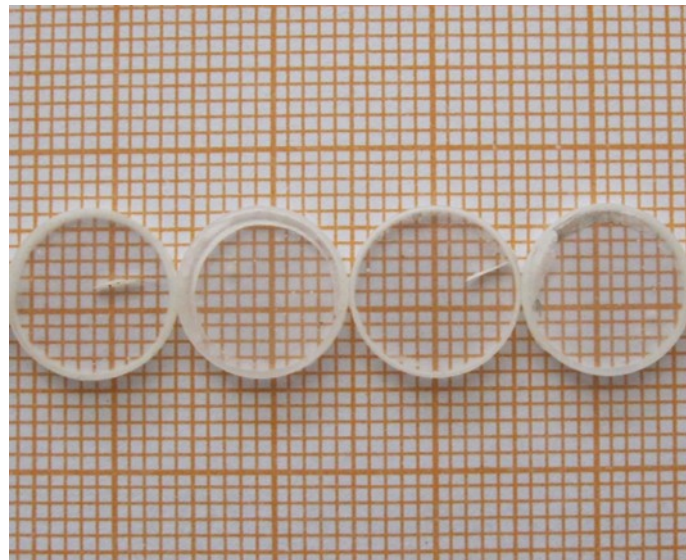

Figure S3. The photographs of the as-obtained transparent ceramics sintering from the powders obtained via the partial wet chemical route. The transparency of the ceramics are good, indicating the good sintering property of the as-obtained YAG powders.

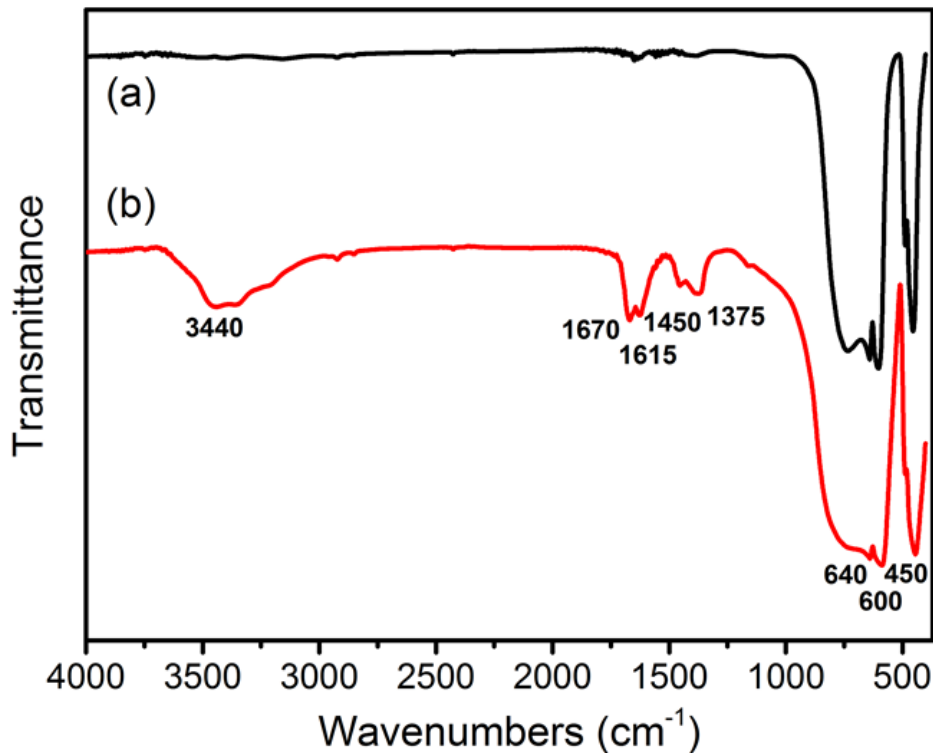

Figure S4. FTIR spectra of the pure Al<sub>2</sub>O<sub>3</sub> (curve a), Al<sub>2</sub>O<sub>3</sub>-NH<sub>4</sub>HCO<sub>3</sub> (curve b) in the synthesis process.

To certificate if the carbonate group can adsorb on the surface of Al<sub>2</sub>O<sub>3</sub>, FTIR spectrum of Al<sub>2</sub>O<sub>3</sub> nanoparticles collected from Al<sub>2</sub>O<sub>3</sub>-NH<sub>4</sub>HCO<sub>3</sub> was taken. The FTIR spectrum of Al<sub>2</sub>O<sub>3</sub>-NH<sub>4</sub>HCO<sub>3</sub> (Fig. S4, b) have characteristic adsorption of OH<sup>-</sup> groups whose peak at 1670 and 3700-3000 cm<sup>-1</sup> centered at 3440 cm<sup>-1</sup>, CO<sub>3</sub><sup>2-</sup> whose peak at 1375 and 1450 cm<sup>-1</sup>, is quite different from the FTIR spectra of pure Al<sub>2</sub>O<sub>3</sub> (Fig. S4, a). It indicates that the surface of bar Al<sub>2</sub>O<sub>3</sub> can adsorb some groups hydrolyzed from NH<sub>4</sub>HCO<sub>3</sub> after intense stirring in Al<sub>2</sub>O<sub>3</sub>-NH<sub>4</sub>HCO<sub>3</sub> system.

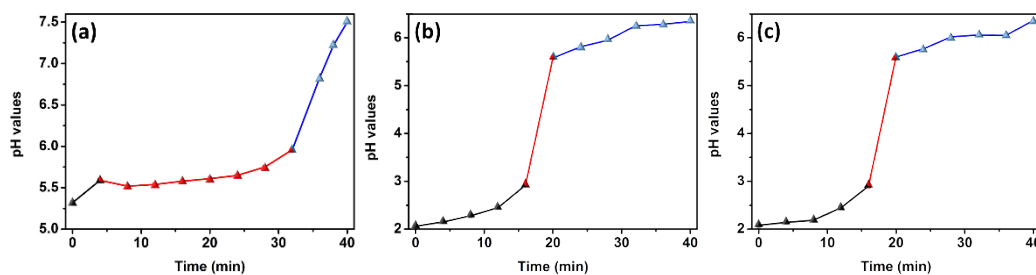

Figure S5. The pH evolution of different reaction system:  $\text{Al}_2\text{O}_3\text{-Y}(\text{NO}_3)_3\text{-NH}_4\text{HCO}_3$  system (a),  $\text{Al}_2\text{O}_3\text{-Y}(\text{NO}_3)_3\text{-Urea}$  system with PAA as surfactant (b), and  $\text{Al}_2\text{O}_3\text{-Y}(\text{NO}_3)_3\text{-Urea}$  system (c).
